# Supplementary material for: Comparative proteomic analysis reveals a dynamic pollen plasma membrane protein map and the membrane landscape of receptor-like kinases and transporters important for pollen tube growth and interaction with pistils in rice
Source: PubMed Central journal article supplement (PMC5217431; doi:10.1186/s12870-016-0961-7), 2017-01-05

### Peptide Quantitation Information

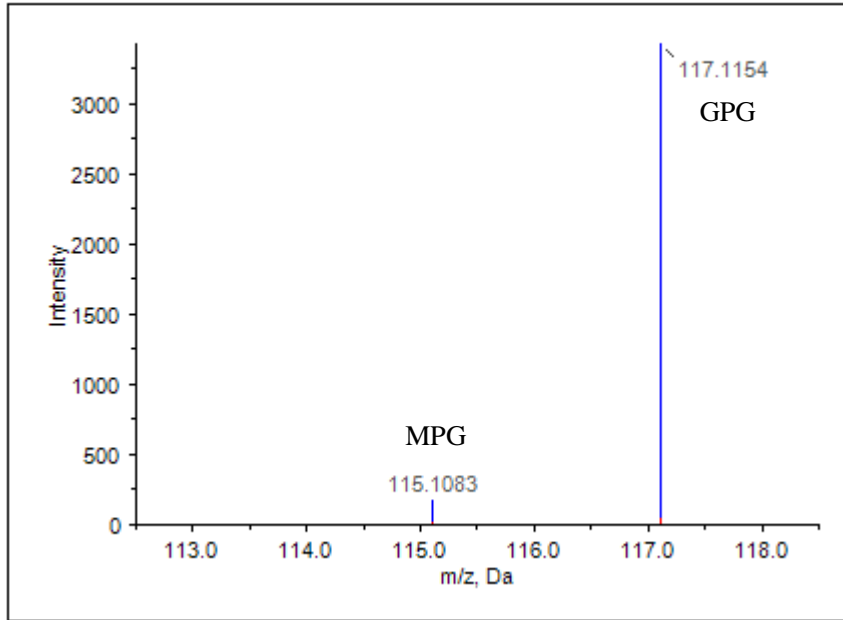

### Precursor MS Region

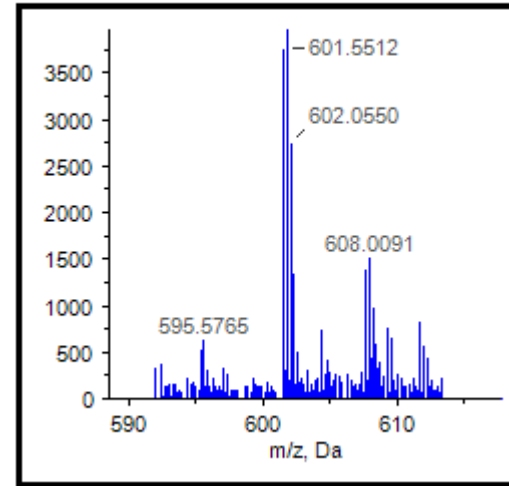

**Accession:** gi|115454901

**Sequence:**

QAFDDAIAELDTLGEESYK

**Repeat 1:** experiment 1

**GPG (117) / MPG (115) = 8.55**

**Precursor mass (m/z): 601.55**

### Fragmentation Evidence for Peptide

IT4 QAFDDAIAELDTLGEESYK[IT4]

| Residue | b         | b+2       | y         | y+2       |
|---------|-----------|-----------|-----------|-----------|
| Q       | 273.1679  | 137.0876  | 2403.1806 | 1202.0939 |
| A       | 344.2050  | 172.6062  | 2131.0199 | 1066.0136 |
| F       | 491.2734  | 246.1404  | 2059.9828 | 1030.4950 |
| D       | 606.3004  | 303.6538  | 1912.9144 | 956.9608  |
| D       | 721.3273  | 361.1673  | 1797.8875 | 899.4474  |
| A       | 792.3644  | 396.6859  | 1682.8605 | 841.9339  |
| I       | 905.4485  | 453.2279  | 1611.8234 | 806.4153  |
| A       | 976.4856  | 488.7464  | 1498.7393 | 749.8733  |
| E       | 1105.5282 | 553.2677  | 1427.7022 | 714.3547  |
| L       | 1218.6123 | 609.8098  | 1298.6596 | 649.8334  |
| D       | 1333.6392 | 667.3232  | 1185.5756 | 593.2914  |
| T       | 1434.6869 | 717.8471  | 1070.5486 | 535.7779  |
| L       | 1547.7710 | 774.3891  | 969.5009  | 485.2541  |
| G       | 1604.7924 | 802.8999  | 856.4169  | 428.7121  |
| E       | 1733.8350 | 867.4211  | 799.3954  | 400.2013  |
| E       | 1862.8776 | 931.9424  | 670.3528  | 335.6800  |
| S       | 1949.9096 | 975.4585  | 541.3102  | 271.1588  |
| Y       | 2112.9730 | 1056.9901 | 454.2782  | 227.6427  |
| K[IT4]  | 2385.1700 | 1193.0886 | 291.2149  | 146.1111  |

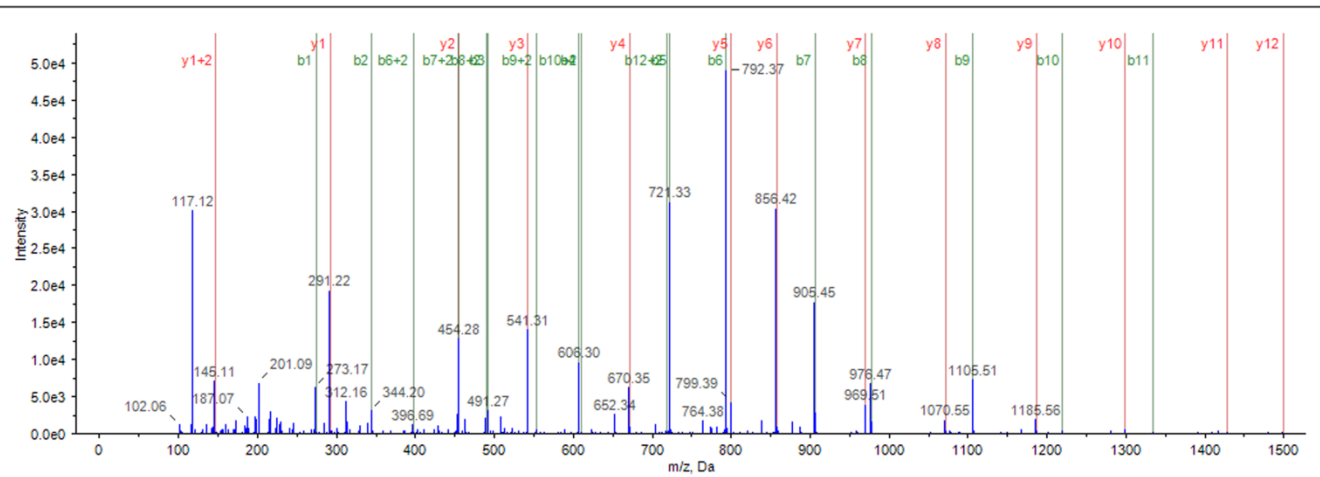

### Peptide Quantitation Information

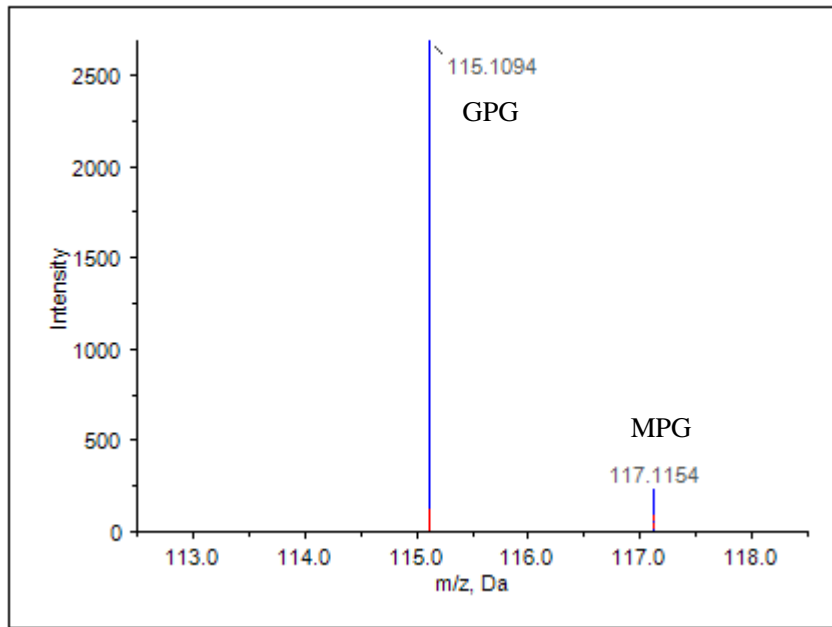

### Precursor MS Region

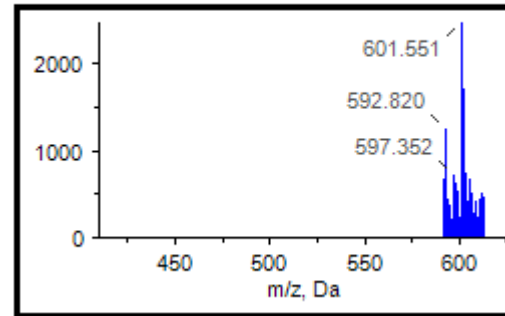

**Accession:** gi|115454901

**Sequence:**

QAFDDAIAELDTLGEESYK

**Repeat 2:** experiment 2

**GPG (115) / MPG (117) = 10.00**

**Precursor mass (m/z): 601.55**

IT4 QAFDDAIAELDTLGEESYK[IT4]

| Residue | b         | b+2       | y         | y+2       |
|---------|-----------|-----------|-----------|-----------|
| Q       | 273.1679  | 137.0876  | 2403.1806 | 1202.0939 |
| A       | 344.2050  | 172.6062  | 2131.0199 | 1066.0136 |
| F       | 491.2734  | 246.1404  | 2059.9828 | 1030.4950 |
| D       | 606.3004  | 303.6538  | 1912.9144 | 956.9608  |
| D       | 721.3273  | 361.1673  | 1797.8875 | 899.4474  |
| A       | 792.3644  | 396.6859  | 1682.8605 | 841.9339  |
| I       | 905.4485  | 453.2279  | 1611.8234 | 806.4153  |
| A       | 976.4856  | 488.7464  | 1498.7393 | 749.8733  |
| E       | 1105.5282 | 553.2677  | 1427.7022 | 714.3547  |
| L       | 1218.6123 | 609.8098  | 1298.6596 | 649.8334  |
| D       | 1333.6392 | 667.3232  | 1185.5756 | 593.2914  |
| T       | 1434.6869 | 717.8471  | 1070.5486 | 535.7779  |
| L       | 1547.7710 | 774.3891  | 969.5009  | 485.2541  |
| G       | 1604.7924 | 802.8999  | 856.4169  | 428.7121  |
| E       | 1733.8350 | 867.4211  | 799.3954  | 400.2013  |
| E       | 1862.8776 | 931.9424  | 670.3528  | 335.6800  |
| S       | 1949.9096 | 975.4585  | 541.3102  | 271.1588  |
| Y       | 2112.9730 | 1056.9901 | 454.2782  | 227.6427  |
| K[IT4]  | 2385.1700 | 1193.0886 | 291.2149  | 146.1111  |

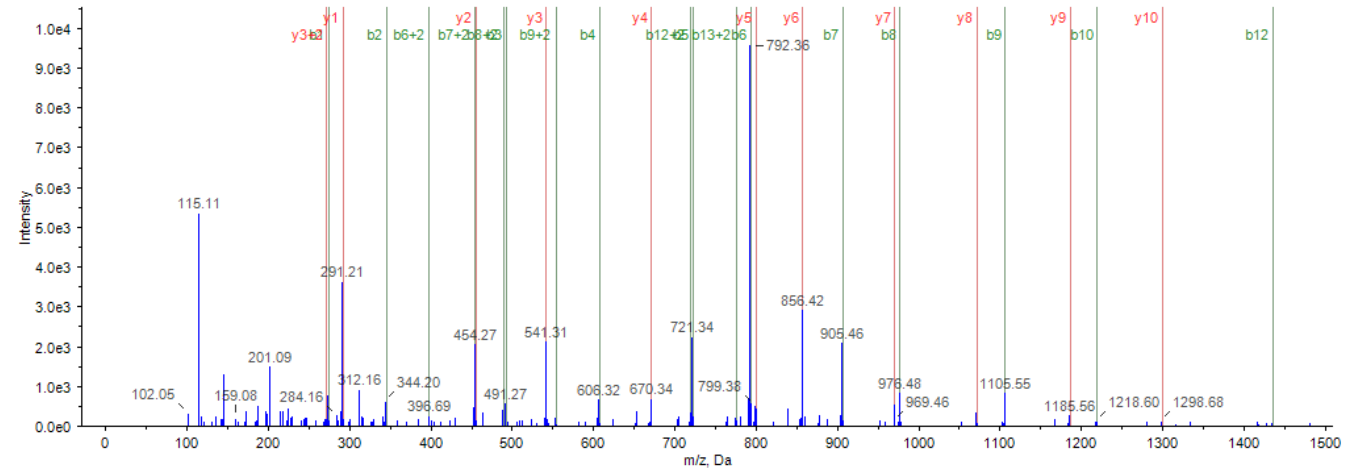

Accession: gi|115443865

Sequence: QIGAPYYIECSSK

Repeat 1: experiment 1

GPG (117) / MPG (115) = 0.13

Precursor mass (m/z): 821.89

### Peptide Quantitation Information

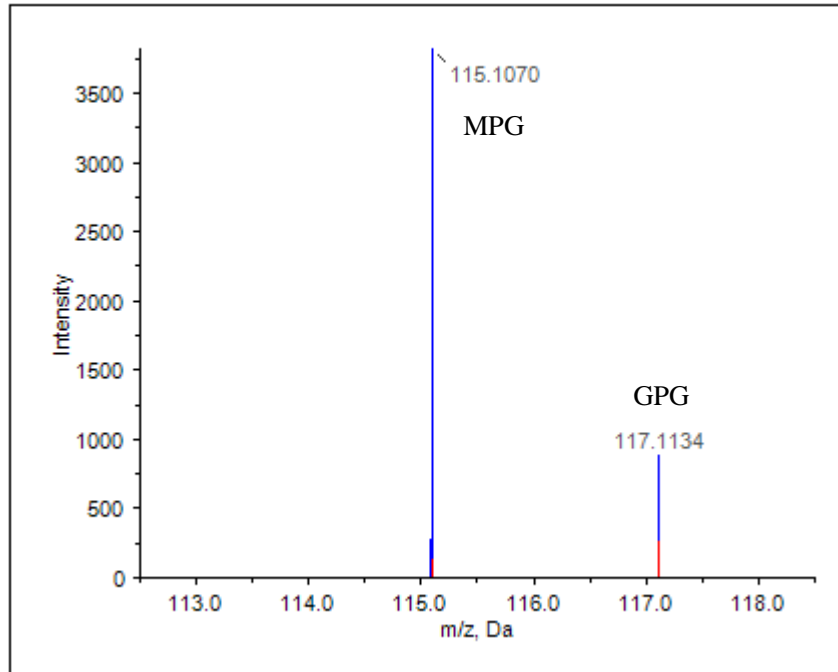

### Precursor MS Region

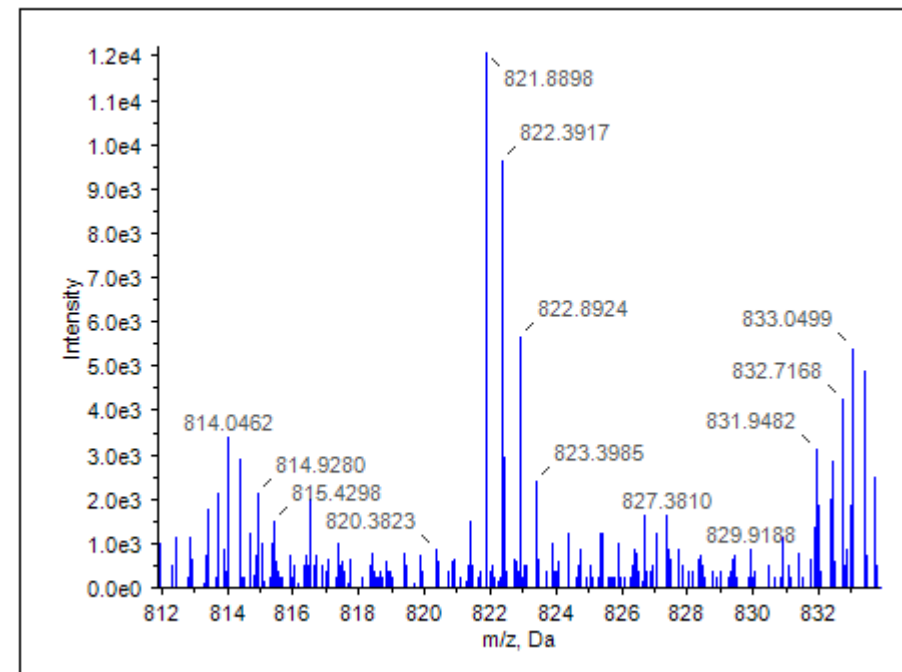

### Fragmentation Evidence for Peptide

IT4 QIGAPYYIEC[CAM]SSK[IT4]

| Residue | b         | b+2      | y         | y+2      |
|---------|-----------|----------|-----------|----------|
| Q       | 273.1679  | 137.0876 | 1803.9189 | 902.4631 |
| I       | 386.2520  | 193.6296 | 1531.7583 | 766.3828 |
| G       | 443.2734  | 222.1404 | 1418.6742 | 709.8408 |
| A       | 514.3106  | 257.6589 | 1361.6528 | 681.3300 |
| P       | 611.3633  | 306.1853 | 1290.6156 | 645.8115 |
| Y       | 774.4267  | 387.7170 | 1193.5629 | 597.2851 |
| Y       | 937.4900  | 469.2486 | 1030.4996 | 515.7534 |
| I       | 1050.5740 | 525.7907 | 867.4362  | 434.2218 |
| E       | 1179.6166 | 590.3120 | 754.3522  | 377.6797 |
| C[CAM]  | 1339.6473 | 670.3273 | 625.3096  | 313.1584 |
| S       | 1426.6793 | 713.8433 | 465.2789  | 233.1431 |
| S       | 1513.7113 | 757.3593 | 378.2469  | 189.6271 |
| K[IT4]  | 1785.9084 | 893.4578 | 291.2149  | 146.1111 |

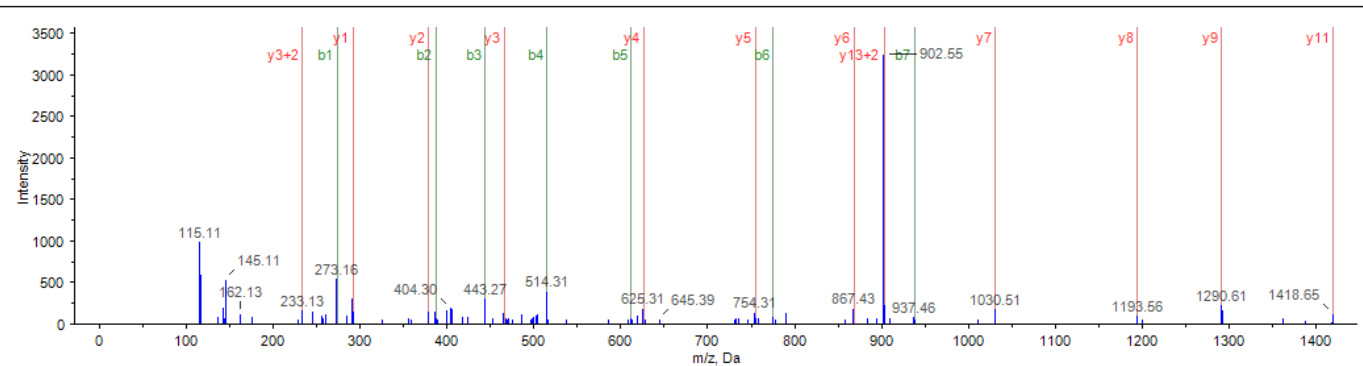

### Peptide Quantitation Information

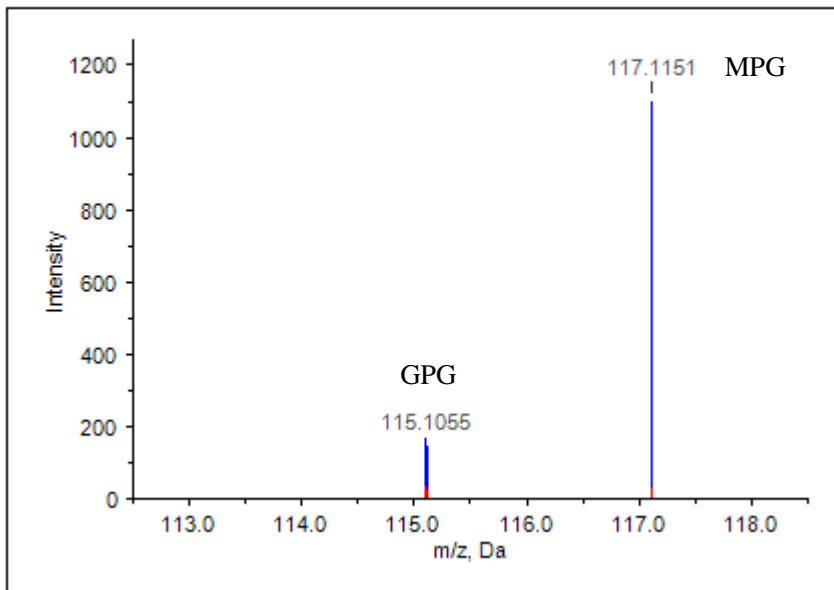

### Precursor MS Region

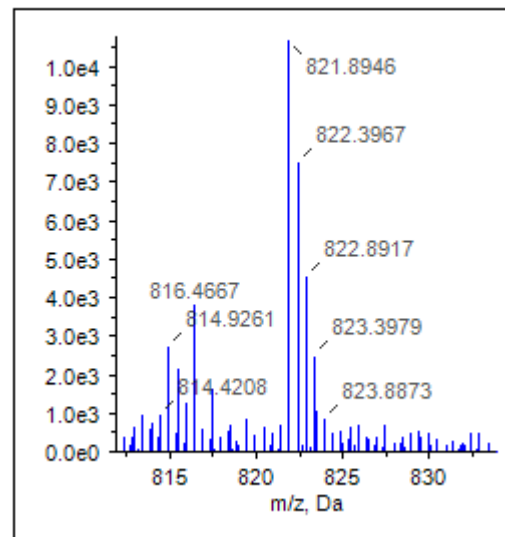

Accession: gi|115443865

Sequence:

QIGAPYYIECSSK

Repeat 2: experiment 2

GPG (115) / MPG (117) = 0.12

Precursor mass (m/z): 821.89

### Fragmentation Evidence for Peptide

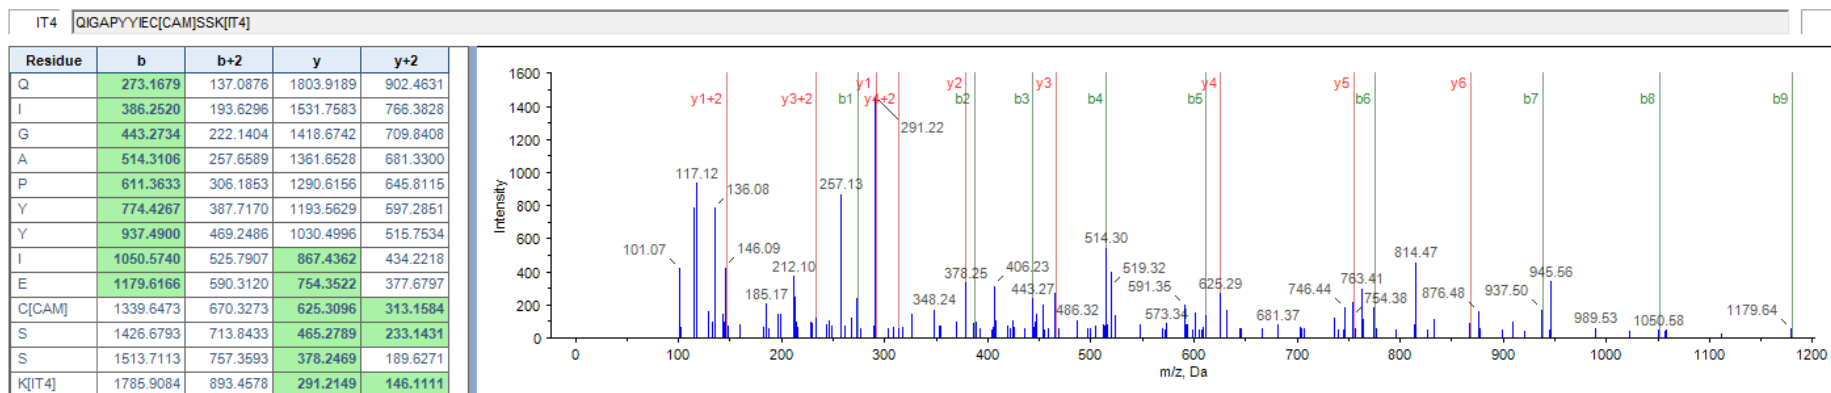

Supplement: 12870_2016_961_MOESM7_ESM.pdf [file 12870_2016_961_MOESM7_ESM.pdf]
