# Supplementary material for: Comparative proteomic analysis reveals a dynamic pollen plasma membrane protein map and the membrane landscape of receptor-like kinases and transporters important for pollen tube growth and interaction with pistils in rice
Source: PubMed Central journal article supplement (PMC5217431; doi:10.1186/s12870-016-0961-7), 2017-01-05
Supplement: 12870_2016_961_MOESM1_ESM.pdf [file 12870_2016_961_MOESM1_ESM.pdf]

# Proteins

# Peptides

MPG GPG

MPG GPG

marker

kDa

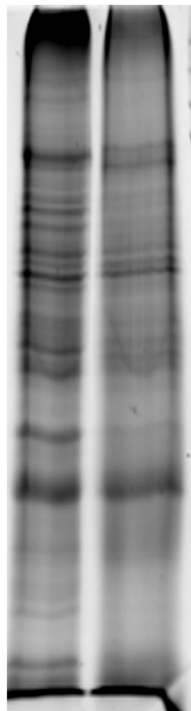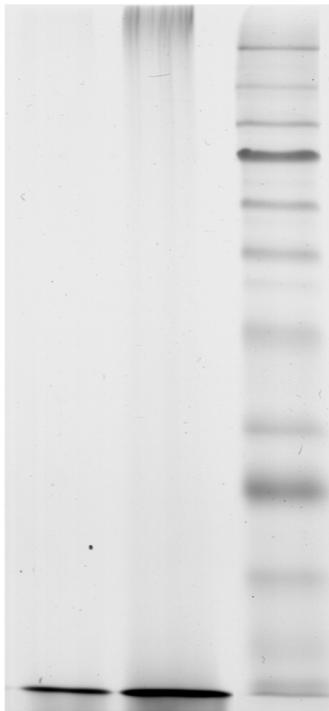

A

B

C

D
