# Supplementary material for: Comparative proteomic analysis reveals a dynamic pollen plasma membrane protein map and the membrane landscape of receptor-like kinases and transporters important for pollen tube growth and interaction with pistils in rice
Source: PubMed Central journal article supplement (PMC5217431; doi:10.1186/s12870-016-0961-7), 2017-01-05

# Experiment 1

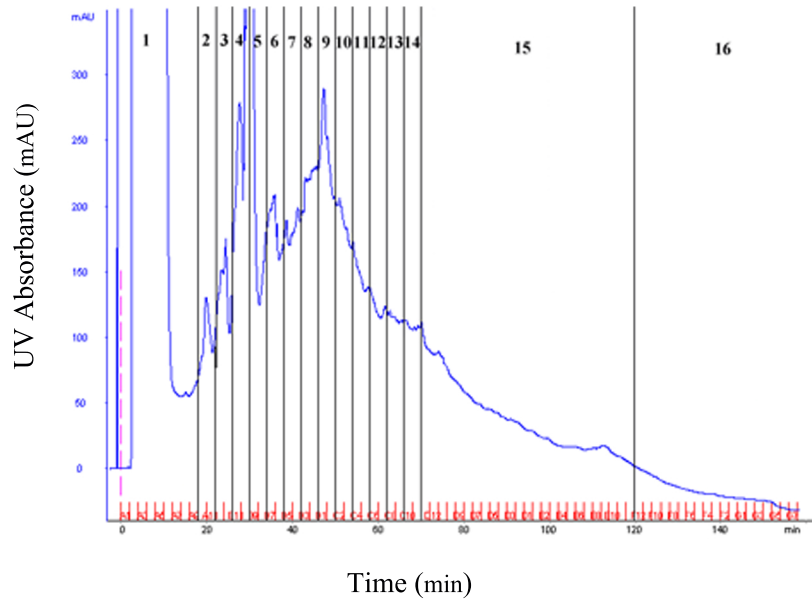

# Experiment 2

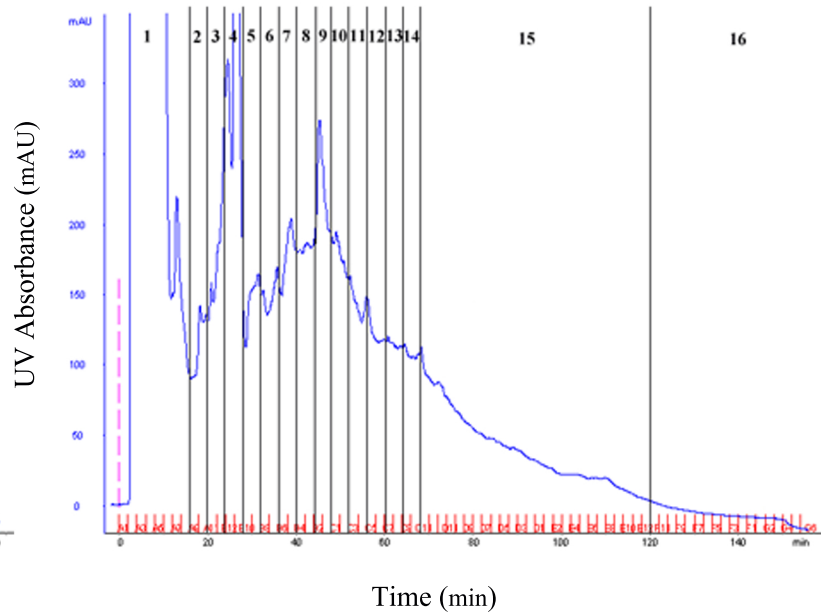

Supplement: 12870_2016_961_MOESM2_ESM.pdf [file 12870_2016_961_MOESM2_ESM.pdf]
