# Supplementary material for: Comparative proteomic analysis reveals a dynamic pollen plasma membrane protein map and the membrane landscape of receptor-like kinases and transporters important for pollen tube growth and interaction with pistils in rice
Source: PubMed Central journal article supplement (PMC5217431; doi:10.1186/s12870-016-0961-7), 2017-01-05
Supplement: 12870_2016_961_MOESM3_ESM.pdf [file 12870_2016_961_MOESM3_ESM.pdf]

**Additional file 3. Summary of spectra, peptides, and proteins identified in the 2 independent iTRAQ experiments**

|                     | <b>Total spectra</b> | <b>Identified peptides</b><br>(Confidence = 95%) | <b>Identified proteins</b><br>(Decoy,<br>unused > 1.3,<br>Two or more peptides<br>matched) | <b>Identified proteins</b><br>(normal,<br>unused > 1.3,<br>Two or more peptides<br>matched) | <b>Quantified proteins</b><br>(unused > 1.3,<br>Two or more<br>peptides matched) | <b>FDR (%)</b> | <b>Total<br/>identified<br/>proteins</b> |
|---------------------|----------------------|--------------------------------------------------|--------------------------------------------------------------------------------------------|---------------------------------------------------------------------------------------------|----------------------------------------------------------------------------------|----------------|------------------------------------------|
| <b>Experiment 1</b> | 109,114              | 24,256                                           | 1                                                                                          | 1,473                                                                                       | 1,381                                                                            | 0.07           | 1,979                                    |
| <b>Experiment 2</b> | 78,037               | 19,965                                           | 1                                                                                          | 1,283                                                                                       | 1,147                                                                            | 0.08           |                                          |
