# Supplementary material for: Comparative proteomic analysis reveals a dynamic pollen plasma membrane protein map and the membrane landscape of receptor-like kinases and transporters important for pollen tube growth and interaction with pistils in rice
Source: PubMed Central journal article supplement (PMC5217431; doi:10.1186/s12870-016-0961-7), 2017-01-05
Supplement: 12870_2016_961_MOESM10_ESM.pdf [file 12870_2016_961_MOESM10_ESM.pdf]

**Additional file 10. Western blot validation of the iTRAQ quantitative information.**

| protein                                                                         | iTRAQ <sup>a</sup> |       |      |      | Western blot <sup>b</sup> |      |      |      |      |
|---------------------------------------------------------------------------------|--------------------|-------|------|------|---------------------------|------|------|------|------|
|                                                                                 | (GPG/MPG)          |       |      |      | (GPG/MPG)                 |      |      |      |      |
|                                                                                 | Exp 1              | Exp 2 | mean | S.D. | 1                         | 2    | 3    | mean | S.D. |
| eIF 4a                                                                          | 5.97               | 5.50  | 5.73 | 0.34 | 7.99                      | 6.00 | 6.20 | 6.73 | 1.10 |
| GAPDH                                                                           | 2.11               | 2.00  | 2.06 | 0.08 | 1.84                      | 2.13 | 2.21 | 2.06 | 0.19 |
| Band_7                                                                          | 0.94               | 0.94  | 0.94 | 0.00 | 0.83                      | 0.89 | 0.93 | 0.88 | 0.05 |
| Sar                                                                             | 0.26               | 0.23  | 0.25 | 0.02 | 0.32                      | 0.28 | 0.30 | 0.30 | 0.02 |
| Correlation coefficient between iTRAQ quantitation and WB quantitation = 0.9983 |                    |       |      |      |                           |      |      |      |      |

a, Protein expression change ratio (GPG/MPG) quantified by iTRAQ.

b, Optical density ratio (GPG/MPG) of Western blot bands measured by Image-Pro Plus v6.0.

eIF 4a, the eukaryotic initiation factor-4a from *Oryza sativa*, gi|115444197; GAPDH, glyceraldehyde-3-phosphate dehydrogenase from *Oryza sativa*, gi|115459078; Band\_7, flotillin like protein from *Oryza sativa*, gi|48716660; Sar, ras-related protein1 from *Arabidopsis thaliana*, AT3G62560, which shares 93% amino acid identity with rice gi|115436368.
