# Supplementary material for: Comparative proteomic analysis reveals a dynamic pollen plasma membrane protein map and the membrane landscape of receptor-like kinases and transporters important for pollen tube growth and interaction with pistils in rice
Source: BMC Plant Biol. 2017 Jan 5;17:2. doi: 10.1186/s12870-016-0961-7 (PMC5217431; doi:10.1186/s12870-016-0961-7)
Supplement: Additional file 15: — Multiple sequence alignment of CrRLK1Ls. Sequence alignments of identified rice pollen CrRLK1Ls gi|56783691, gi|115462979 and gi|25553554, and functionally known HERK1 (AT3G46290), HERK2 (AT1G30570), THE1 (AT5G54380), ANX1 (AT3G04690), ANX2 (AT5G28680) and FER (AT3G51550) from Arabidopsis. These CrRLK1Ls have a variable malectin domain (underlined in purple) and highly conserved kinase domain (in red) along with one transmembrane domain (in orange) predicted by SMART. Identical and similar amino acids are shaded in blue and yellow. (PDF 18045 kb) [file 12870_2016_961_MOESM15_ESM.pdf]

|              |                                                                                                                         |     |
|--------------|-------------------------------------------------------------------------------------------------------------------------|-----|
| ANKX1        | CLNDSLSLEPPTMSGLVLLNLEFALQLQETADGTRHRTPT-----NNGGSSDLGGKGGMAVNI-----AGRDVVS-----DLSSDE-----NTEIFSSQLVNPNGR              | 850 |
| ANKX2        | CLSDSDGLDRPTMSGLVLLNLEFALQLQETADGSRHRTPT-----NNGGSSVDLGGGGGVTVNISAGESDLDG-----DLSDSEE-----NSGIFSSQLVNPNGR               | 858 |
| EFER         | CVLDSQGIETPMSGLVLLNLEFALQLQETSAEEENGKVGCGMDMDIETKYDDGNCKGKNDKSSDVEYGNVTDSRSSSGIDMSIGG-----VRLSEDESDGLTSPAVSSQIMNPNGR    | 893 |
| gi 56783691  | CLSDNGITERTPTMSGLVLLNLESAMHFPQDAFAAAGRPFVPAL-----DAAAGSSSHLDGDSSTAINTLATSSSTSHHEPCVD-----VLSLEPDDV-----VAERATSSQLVQPTGR | 885 |
| gi 115462979 | CLADHGVDRPTMSGLVLLNLEFALQLQETTFENG-----KTEGADSTSDSTTTSVADSSMAANAALS-----LIS-----EDMDEED-----IANSVVFSSQLVQPTGR           | 869 |
| gi 25553554  | CLAEFGSDRISMGLVLLNLEFALQLQDANPP-----EGADKPADHDG-----AGAAPATSSG-----SGVSTPVDVSTTAAAGEMFAQLADMKGK                         | 845 |
